# Supplementary material for: Human Milk Exosomal MicroRNA: Associations with Maternal Overweight/Obesity and Infant Body Composition at 1 Month of Life
Source: PubMed Central journal article supplement (PMC8066780; doi:10.3390/nu13041091), 2021-03-27
Supplement: nutrients-13-01091-s001.pdf [file nutrients-13-01091-s001.pdf]

**Supplemental Table S1. miRNA sequences**

| miRNA           | Taqman Assay ID | Mature Sequence         |
|-----------------|-----------------|-------------------------|
| hsa-miR-29a-3p  | 002112          | UAGCACCAUCUGAAAUCGGUUA  |
| hsa-miR-29b-3p  | 000413          | UAGCACCAUUUGAAAUCAGUGUU |
| hsa-miR-30b-5p  | 000602          | UGUAAACAUCCUACACUCAGCU  |
| hsa-miR-148a-3p | 000470          | UCAGUGCACUACAGAACUUUGU  |
| hsa-let-7a-5p   | 000377          | UGAGGUAGUAGGUUGUAUAGUU  |
| hsa-32-3p       | 002111          | CAAUUUAGUGUGUGUGAUUUU   |
